# Supplementary material for: Rare earth orthoniobate photochromics with self-activated upconversion emissions for high-performance optical storage applications
Source: Royal Society of Chemistry journal article supplement (doi:10.1039/d1tc02987h), 2021-01-01
Supplement: d1tc02987h1.pdf [file d1tc02987h1.pdf]

## Supporting Information

# Novel self-activated upconversion rare earth orthoniobate photochromics with high-performance optical storage

Zhen Zhang<sup>1</sup>, Lingju Guo<sup>2</sup>, Haiqin Sun<sup>1\*</sup>, Dengfeng Peng<sup>3</sup>, Hua Zou<sup>4</sup>, Ningning Sun<sup>1</sup>, Qiwei Zhang<sup>1\*</sup>, Xihong Hao<sup>1</sup>

<sup>1</sup>Inner Mongolia Key Laboratory of Ferroelectric-related New Energy Materials and Devices, School of Materials and Metallurgy, Inner Mongolia University of Science and Technology, 7# Arerding Street, Kun District, Baotou 014010, China.

<sup>2</sup>Laboratory of Theoretical and Computational Nanoscience, CAS Center for Excellence in Nanoscience, CAS Key Laboratory of Nanophotonic Materials and Devices, National Center for Nanoscience and Technology, Chinese Academy of Sciences, Beijing 100190, China.

<sup>3</sup>College of Optoelectronic Engineering, Shenzhen University, Shenzhen 518060, China

<sup>4</sup>School of Science, Hainan university, Haikou 570228, China.

\*E-mail: a8082sz@imust.edu.cn (H. Sun), qwzhang2021@163.com (Q. Zhang)

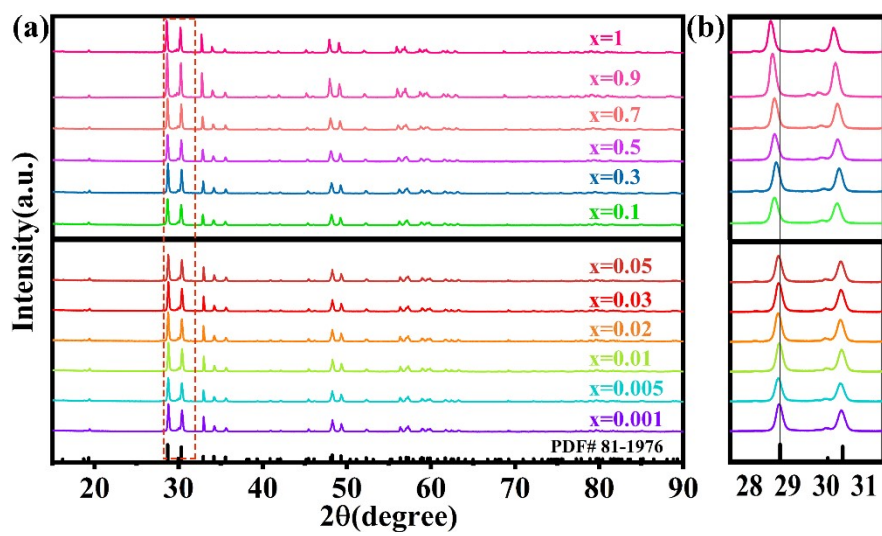

**Figure S1.** XRD patterns of  $\text{Er}_x\text{Yb}_{1-x}\text{NbO}_4$  solid solutions measured at (a)  $2\theta = 10-90^\circ$ , and (b)  $2\theta = 28-31^\circ$ .

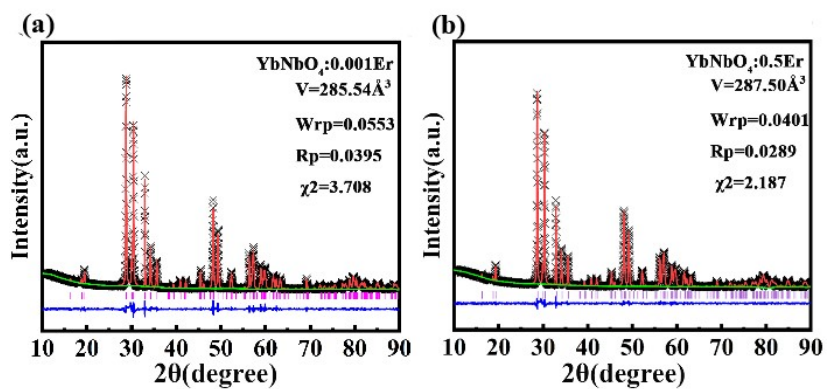

**Figure S2.** XRD refinements of samples: (a)  $\text{Er}_x\text{Yb}_{1-x}\text{NbO}_4$  ( $x=0.001$ ), (b)  $\text{Er}_x\text{Yb}_{1-x}\text{NbO}_4$  ( $x=0.5$ ) b).

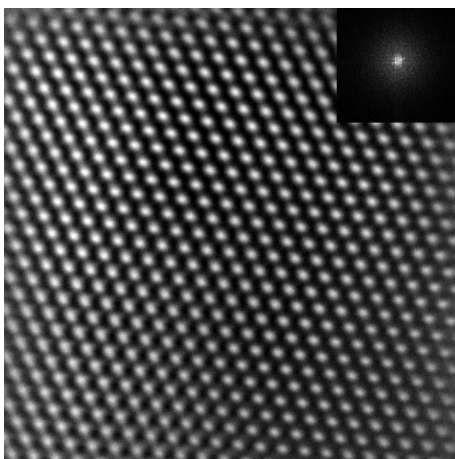

**Figure S3.** Inverse fast fourier transformation (FFT) and diffraction images of  $\text{ErNbO}_4$  sample.

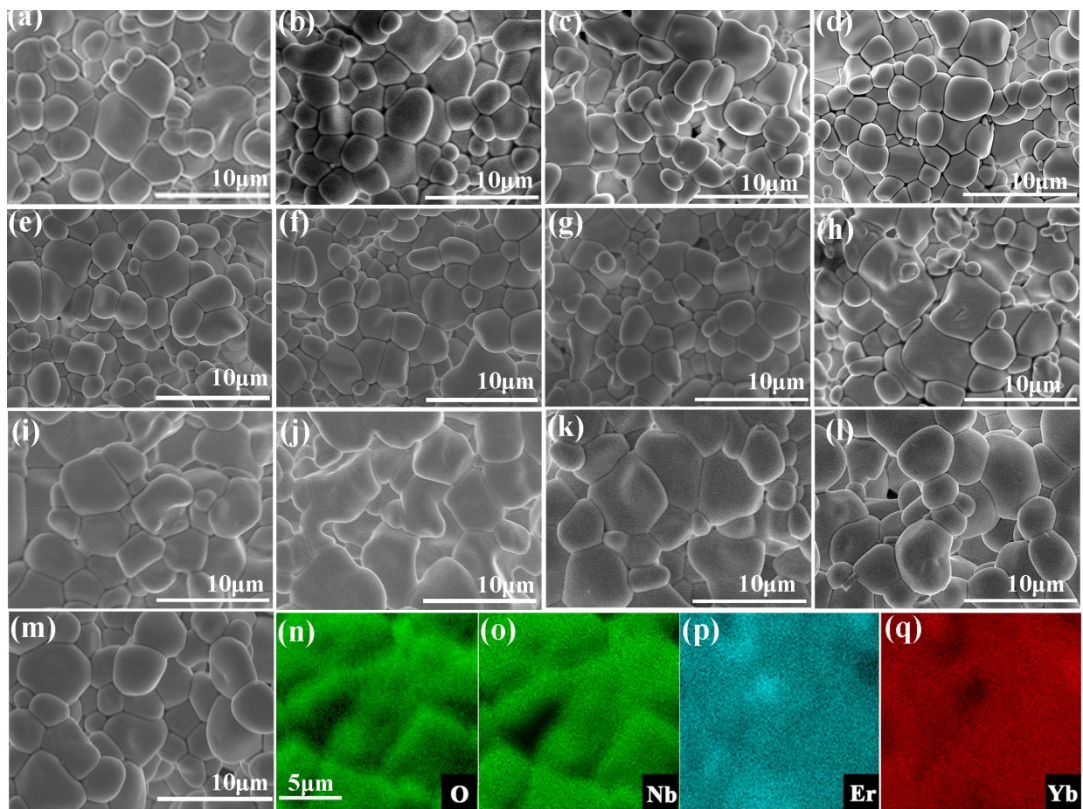

**Figure S4.** SEM images and element mappings of  $\text{Er}_x\text{Yb}_{1-x}\text{NbO}_4$  samples: (a)  $x=0$ , (b)  $x=0.001$ , (c)  $x=0.005$ , (d)  $x=0.01$ , (e)  $x=0.02$ , (f)  $x=0.03$ , (g)  $x=0.05$ , (h)  $x=0.1$ , (i)  $x=0.3$ , (j)  $x=0.5$ , (k)  $x=0.7$ , (l)  $x=0.9$ , (m)  $x=1$ . (n)-(q) Yb, Er, O, and Nb element mappings of  $\text{Er}_{0.5}\text{Yb}_{0.5}\text{NbO}_4$ , respectively.

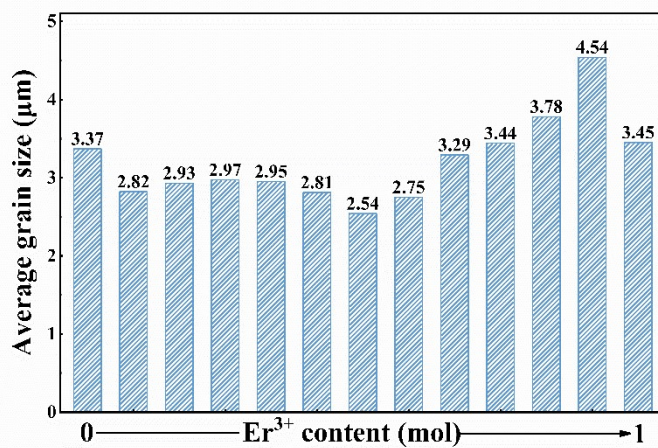

**Figure S5.** Average grain size of  $\text{Er}_x\text{Yb}_{1-x}\text{NbO}_4$  samples.

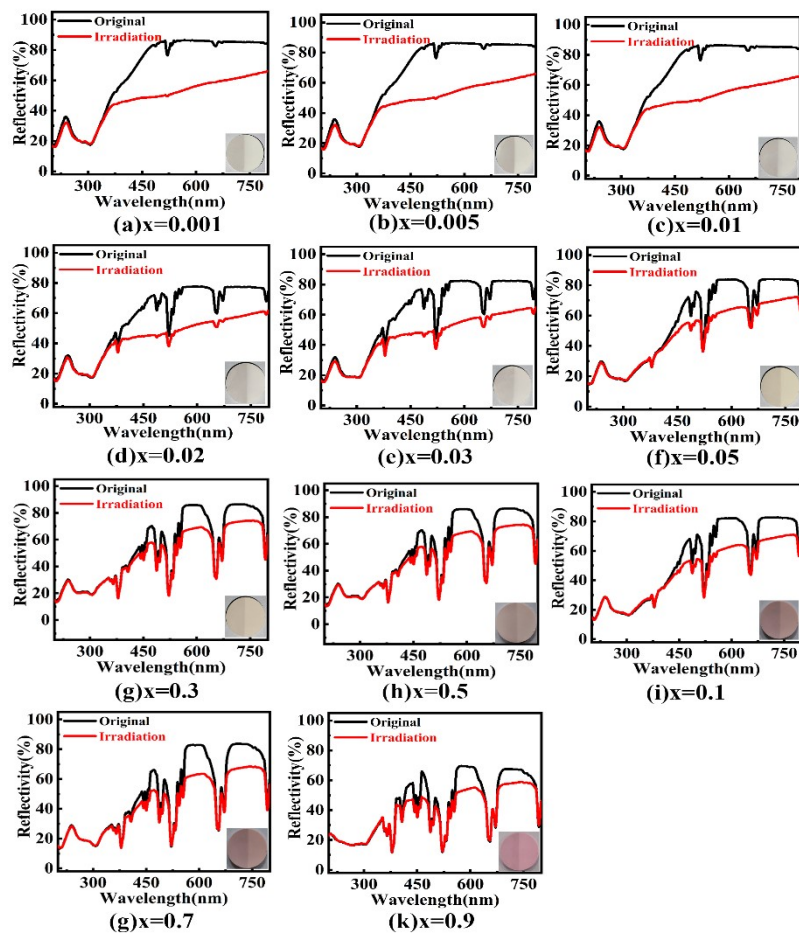

**Figure S6.** Reflection spectral changes of  $\text{Er}_x\text{Yb}_{1-x}\text{NbO}_4$  samples before and after 365 nm irradiation for 10 s. The insets are surface color photographs of ceramic samples before (right) and after (left) 365 nm irradiation.

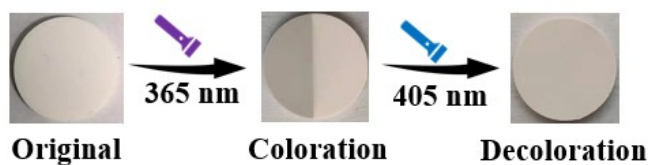

**Figure S7.** Surface color changes of coloration and decoloration process for  $\text{YbNbO}_4$  sample upon 365 nm and 405 nm irradiation.

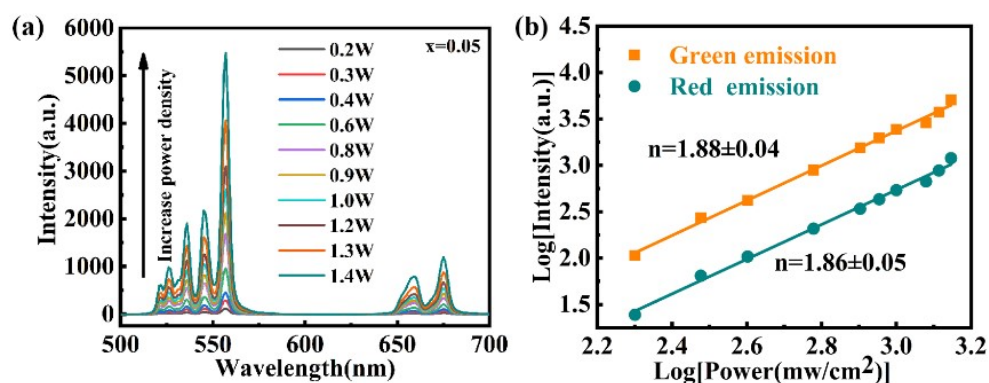

**Figure S8.** (a) UC emission spectra of  $\text{Er}_x\text{Yb}_{1-x}\text{NbO}_4$  ( $x=0.05$ ) sample with different pumping powers. (b) UC intensity (green and red emission) dependence on the pumping power of  $\text{Er}_x\text{Yb}_{1-x}\text{NbO}_4$  ( $x=0.05$ ) in a logarithmic diagram.

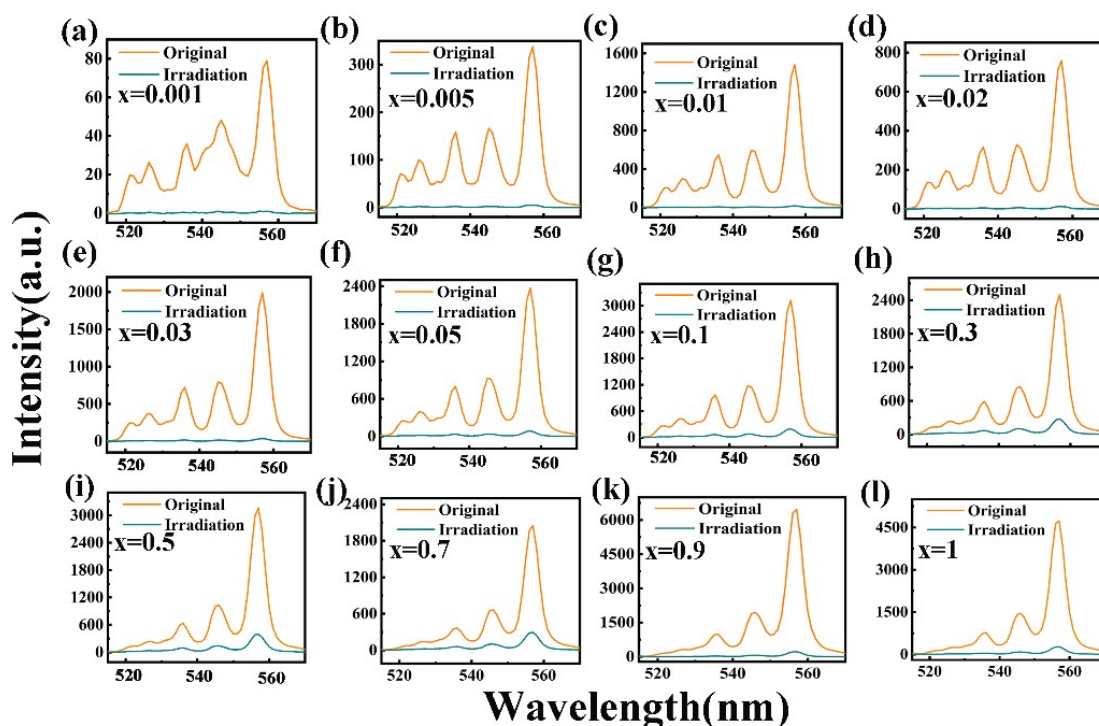

**Figure S9.** UC emission spectral changes of  $\text{Er}_x\text{Yb}_{1-x}\text{NbO}_4$  samples before and after 365 nm irradiation.

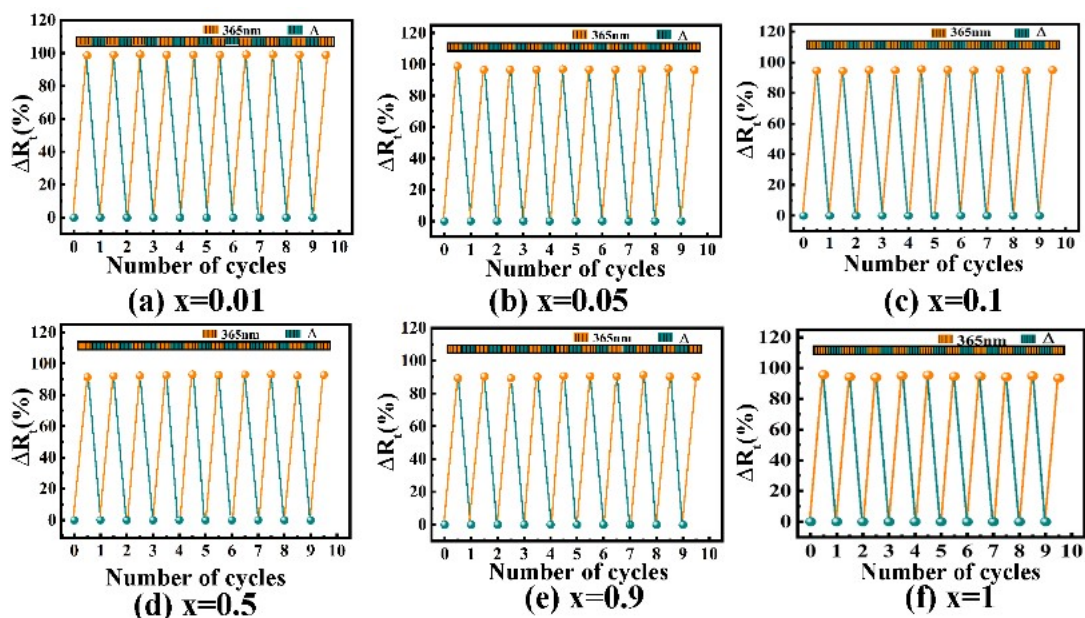

**Figure S10.** The changes of luminescent switching contrast ( $\Delta R_i$ ) upon alternating 365 nm

Irradiation (10s) and thermal stimulus (500 °C, 10 min) under 10 cycles.

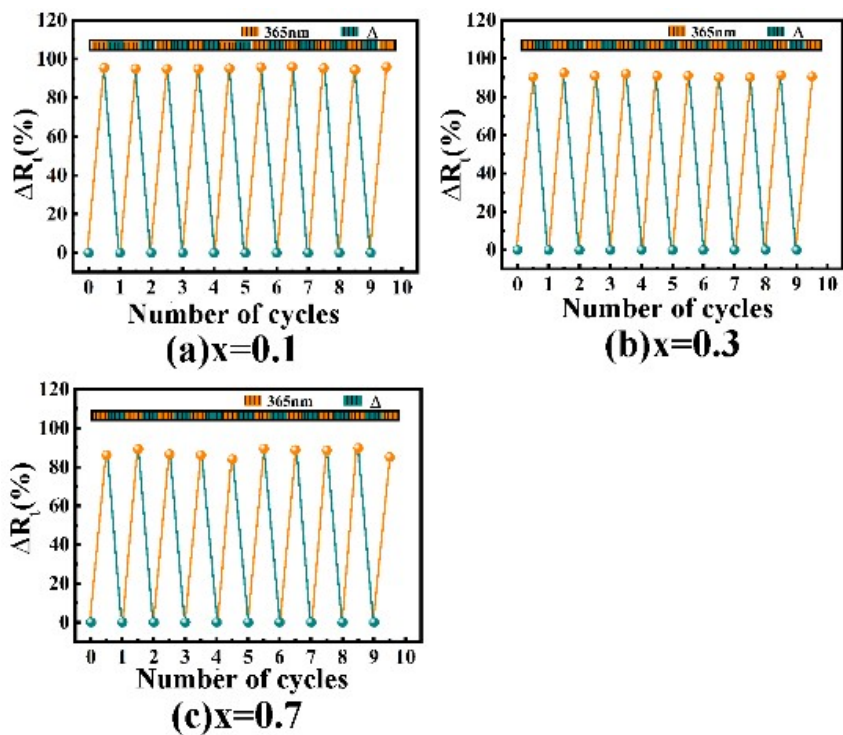

**Figure S11.** The changes of luminescent switching contrast ( $\Delta R_i$ ) upon alternating 365 nm Irradiation (10s) and thermal stimulus (300 °C, 30 min) under 10 cycles.

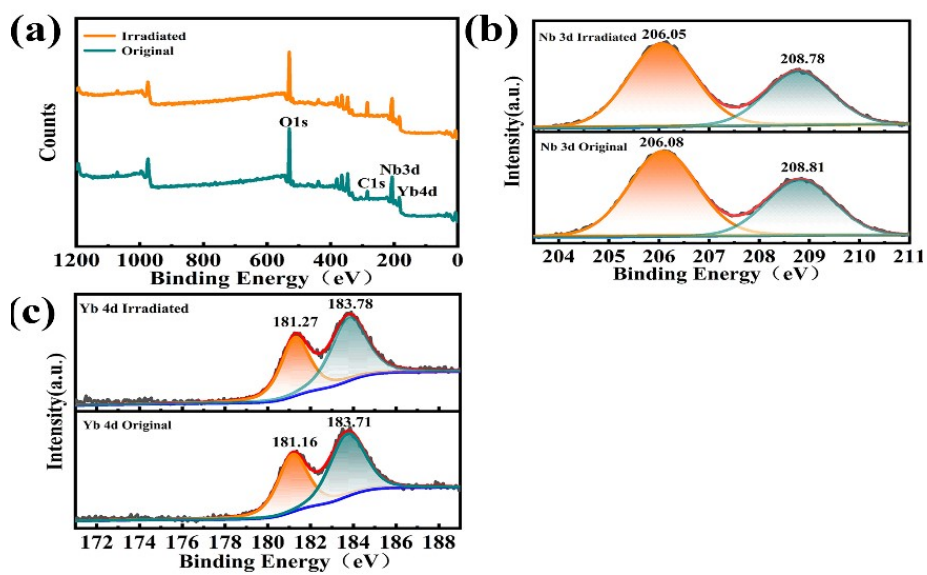



**Figure S12.** (a) XPS spectra of YbNbO<sub>4</sub> sample. (b) and (c) Fitting Nb3d and Yb4d spectra before and after 365 nm irradiation.

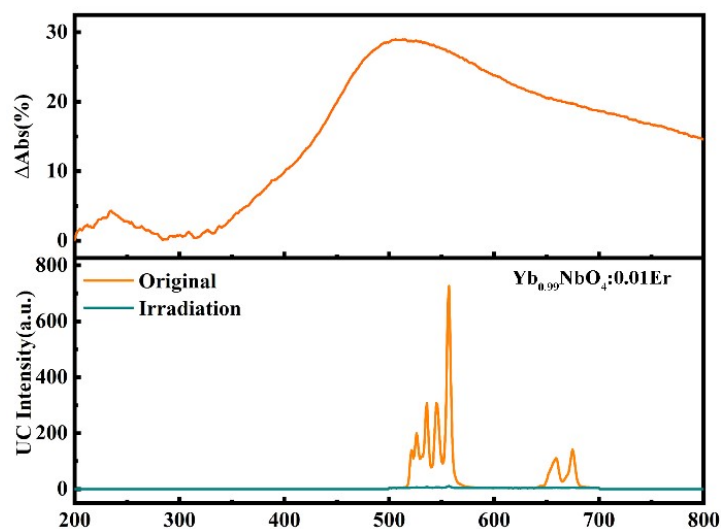

**Figure S13.** A comparison of absorption spectrum ( $\Delta\text{Abs}$ ) (up) for YbNbO<sub>4</sub> and UC emission spectrum for Er<sub>x</sub>Yb<sub>1-x</sub>NbO<sub>4</sub> (x=0.01) (down).

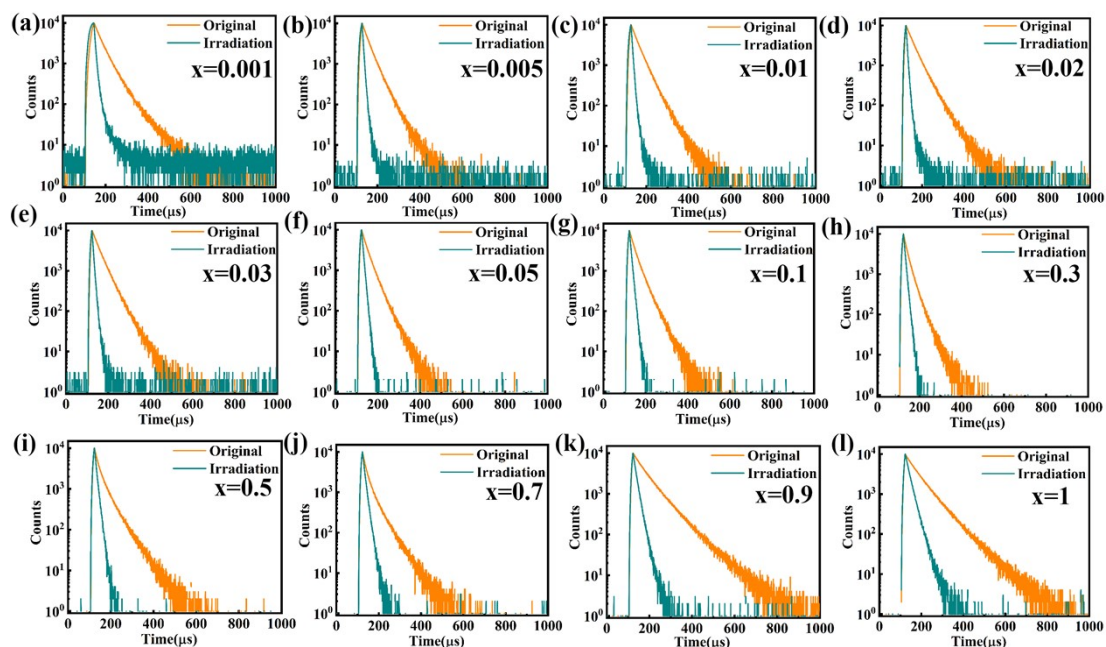

**Figure S14.** Decay life times of Er<sub>x</sub>Yb<sub>1-x</sub>NbO<sub>4</sub> samples before and after 365 nm irradiation.

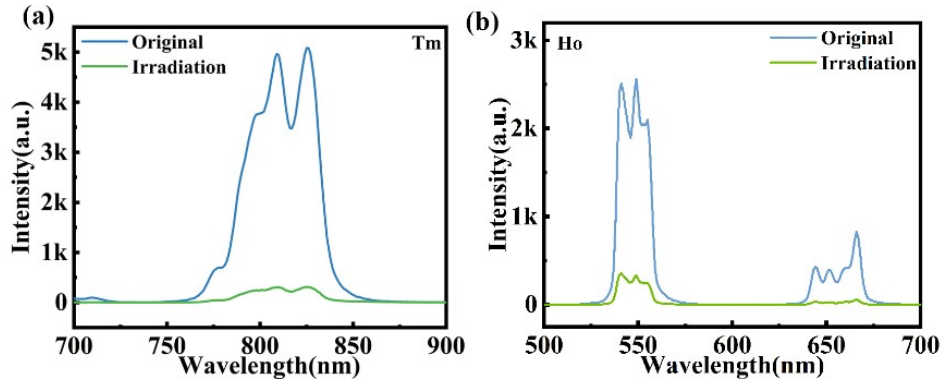

**Figure S15.** UC emission spectral changes of Tm or Ho doped  $\text{YbNbO}_4$  samples before and after 365 nm irradiation: (a)  $\text{Tm}_{0.1}\text{Yb}_{0.9}\text{NbO}_4$ , (b)  $\text{Ho}_{0.1}\text{Yb}_{0.9}\text{NbO}_4$ .

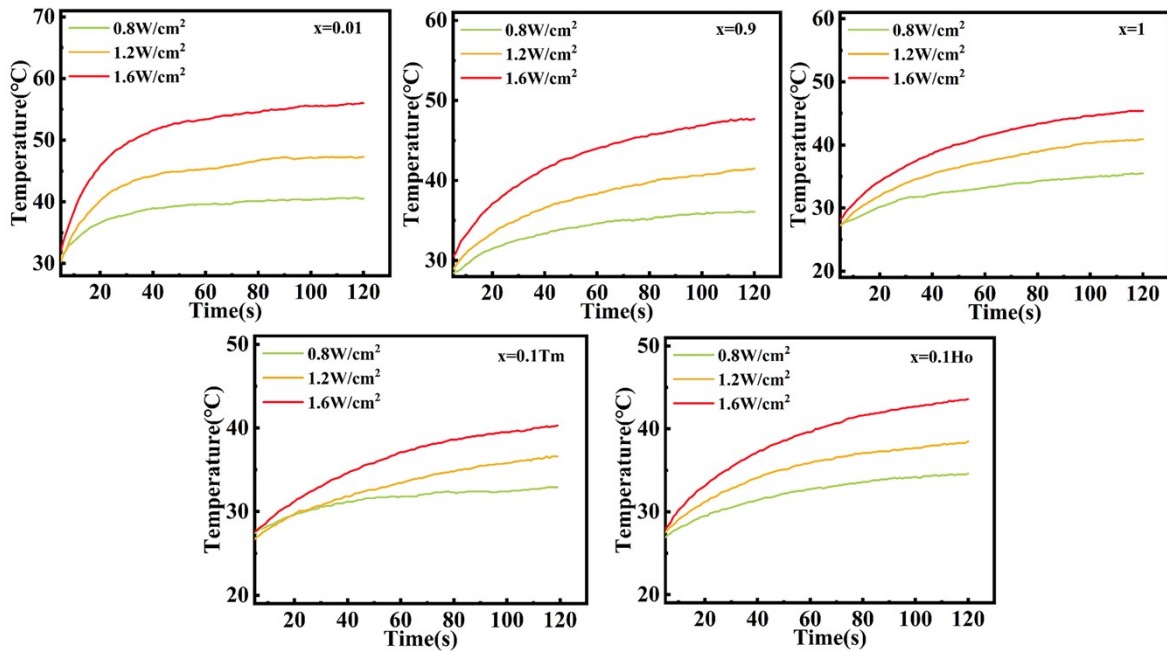

**Figure S16.** Temperature dependence on 980 nm laser irradiation time and power density for the  $\text{Er}_x\text{Yb}_{1-x}\text{NbO}_4$  ( $x=0.01, 0.9, \text{ and } 1$ ),  $\text{Tm}_y\text{Yb}_{1-y}\text{NbO}_4$  ( $y = 0.1$ ) and  $\text{Ho}_z\text{Yb}_{1-z}\text{NbO}_4$  ( $z = 0.1$ ) samples.

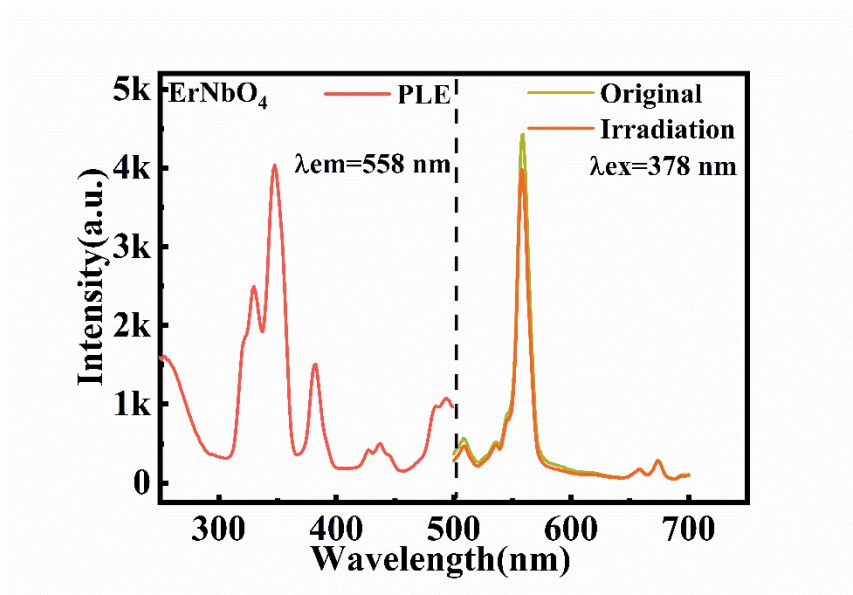

**Figure S17.** Downshifting excitation (left) and emission (right) spectra of ErNbO<sub>4</sub> sample ( $\lambda_{\text{ex}}=378$  nm,  $\lambda_{\text{em}}=558$  nm) before and after 365 nm irradiation.

**Table S1.** Photoluminescence, luminescent modulation, response time, and decoloration and coloration process in some representative inorganic photochromic materials.

| Samples                                            | $\lambda_{em}$ | $\lambda_{ex}$ | $\Delta Rt\%$ | Decoloration | Coloration         | Readout | Ref.      |
|----------------------------------------------------|----------------|----------------|---------------|--------------|--------------------|---------|-----------|
| KNN:Ho <sup>3+</sup>                               | 453nm          | 551nm          | 77%           | 230°C 10min  | 407nm 20s          | -DS     | [1]       |
| KSN:Sm <sup>3+</sup>                               | 407nm          | 601nm          | 60%           | 200°C 10min  | 395nm 60s          | -DS     | [2]       |
| BMS:Bi <sup>3+</sup>                               | 365nm          | 510nm          | 65%           | 532nm 20min  | 254nm 16min        | -DS     | [3]       |
| BZO:Sm <sup>3+</sup>                               | 406nm          | 596nm          | 90.05%        | 200°C 20min  | 254nm 8min         | -DS     | [4]       |
| BiT:Pr <sup>3+</sup>                               | 451 nm         | 611nm          | 76%           | 250°C 1min   | 405nm 5min         | -DS     | [5]       |
| KNN:Pr <sup>3+</sup>                               | 448 nm         | 610nm          | 50.71%        | 200°C 5min   | 395nm 5min         | -DS     | [6]       |
| SSO:Sm <sup>3+</sup>                               | 407nm          | 647nm          | 72.2%         | 300°C 10min  | 290nm 5min         | -DS     | [7]       |
| NBN:Er <sup>3+</sup> /Yb <sup>3+</sup>             | 980nm          | 557nm          | 85.88%        | 200°C 10min  | 407nm 10s          | 16%UC   | [8]       |
| NBN:Er <sup>3+</sup> /Yb <sup>3+</sup>             | 487nm          | 550nm          | 35%           | 200°C 10min  | 407nm<br>(in situ) | 35%DS   | [8]       |
| PWO:Er <sup>3+</sup> /Yb <sup>3+</sup>             | 980 nm         | 532nm          | 80%           | 808nm 140s   | 532nm 40s          | -UC     | [9]       |
| SBT:Ho <sup>3+</sup> /Yb <sup>3+</sup>             | 980 nm         | 546nm          | 74%           | 200°C 1min   | 405nm 3min         | -UC     | [10]      |
| KNLNB:Er <sup>3+</sup>                             | 980 nm         | 556nm          | 60.46%        | 230°C 10min  | 407nm 20s          | -UC     | [11]      |
| NBT:Ho <sup>3+</sup> /Yb <sup>3+</sup>             | 980 nm         | 546nm          | 36.6%         | 230°C 10min  | 405nm 3min         | -UC     | [12]      |
| NBN:Eu <sup>3+</sup>                               | 465 nm         | 618nm          | 63%           | 200°C 10min  | 465nm<br>(in situ) | 63%DS   | [13]      |
| NBN:Pr <sup>3+</sup>                               | 452 nm         | 613nm          | 50%           | 200°C 10min  | 452nm<br>(in situ) | 50%DS   | [14]      |
| NBN:Sm <sup>3+</sup>                               | 406 nm         | 603nm          | 62%           | 200°C 10min  | 406nm<br>(in situ) | 62%DS   | [15]      |
| Er <sub>x</sub> Yb <sub>1-x</sub> NbO <sub>4</sub> | 980nm          | 556nm          | 99.2%         | 405nm 5min   | 365nm <1s          | Non     | This Work |

Readout: destruction degree with DS or UC readout mode. -: No report; Non: non-destructive readout.

**Table S2.** Fitting parameters of O1s-XPS spectra of YbNbO<sub>4</sub> before and after irradiation at 365 nm

| Samples     | Lattice O(O <sup>2-</sup> ) | Absorb (Vo) | Vo/ O <sup>2-</sup> |
|-------------|-----------------------------|-------------|---------------------|
| Original    | 523.29 eV                   | 531.16 eV   | 0.189               |
| Irradiation | 529.19 eV                   | 530.951 eV  | 0.352               |

\*Vo means O vacancy

**Table S3.** Fitting parameters of the decay lifetime curves of Er<sub>x</sub>Yb<sub>1-x</sub>NbO<sub>4</sub> samples.

| Samples  | $\tau_1(\mu s)$ |       | $\tau_2(\mu s)$ |       | $\chi^2$ |       | $\tau_A(\mu s)$ |       |
|----------|-----------------|-------|-----------------|-------|----------|-------|-----------------|-------|
|          | before          | after | before          | after | before   | after | before          | after |
| x=0.0001 | 30.6            | 6.1   | 65.1            | 24.3  | 1.023    | 1.354 | 43.4            | 8.5   |
| x=0.005  | 25.8            | 5.1   | 46.7            | 12.6  | 1.094    | 1.009 | 34.1            | 5.9   |
| x=0.01   | 26.5            | 5.4   | 46.1            | 14.1  | 0.940    | 0.990 | 36.1            | 6.2   |
| x=0.02   | 28.1            | 5.2   | 50.1            | 15.9  | 0.999    | 1.057 | 39.5            | 5.9   |
| x=0.03   | 26.3            | 5.4   | 46.1            | 11.3  | 1.036    | 1.037 | 36.8            | 6.2   |
| x=0.05   | 19.6            | 5.7   | 38.4            | 8.1   | 1.021    | 0.841 | 30.1            | 7.2   |
| x=0.1    | 19.0            | 7.2   | 39.6            | 11.1  | 0.934    | 0.909 | 29.7            | 7.7   |
| x=0.3    | 14.7            | 6.7   | 32.5            | 9.6   | 1.080    | 1.053 | 23.1            | 7.6   |
| x=0.5    | 15.8            | 6.8   | 50.2            | 10.7  | 0.689    | 0.916 | 34.6            | 8.9   |

|       |      |      |      |      |       |       |      |      |
|-------|------|------|------|------|-------|-------|------|------|
| x=0.7 | 14.7 | 8.5  | 48.8 | 14.4 | 0.762 | 0.868 | 31.7 | 10.3 |
| x=0.9 | 42.5 | 11.7 | 83.7 | 20.3 | 0.984 | 0.894 | 66.9 | 14.1 |
| x=1   | 42.3 | 15.7 | 80.6 | 26.8 | 0.959 | 0.836 | 66.1 | 19.7 |

---

## References

- 1 Y. Zhang, J. Liu, H. Q. Sun, D. F. Peng, R. H. Li, C. K. Bulin, X. S. Wang, Q. W. Zhang and X. H. Hao, *J. Am. Ceram. Soc.*, 2018, 101(6), 2305.
- 2 S. Y. Cao, Q. Chen, J. T. Liu, C. Y. Wu, L. L. Li, J. Xu, G. H. Cheng and F. Gao, *J. Eur. Ceram. Soc.*, 2020, 40(15), 6061.
- 3 Y. T. Ren, Z. W. Yang, Y. H. Wang, M. J. Li, J. B. Qiu, Z. G. Song, J. Yu, A. Ullah and I. Khan, *Sci. China Mater.*, 2020, 63(4), 582.
- 4 R. T. Zhang, Y. H. Jin, L. F. Yuan, H. Y. Wu, G. T. Xiong, C. L. Wang, L. Chen and Y. H. Hu, *J. Lumin.*, 2021, 233, 117922.
- 5 T. Wei, F. M. Yang, B. Jia, C. Z. Zhao, L. Y. Liu, H. J. Zhang, Y. Zhang, J. F. Zhang, X. T. Yan and J. T. Yang, *Ceram. Int.*, 2020, 46(11), 18507.
- 6 Q. Zhang, L. H. Luo, J. Gong, P. Du, W. P. Li and G. L. Yuan, *J. Eur. Ceram. Soc.*, 2020, 40(12), 3946.
- 7 J. Tang, P. Du, W. P. Li, G. L. Yuan, Z. F. Liu and L. H. Luo, *Chem. Eng. J.*, 2021, 410, 128287.
- 8 Q. W. Zhang, S. S. Yue, H. Q. Sun, X. S. Wang, X. H. Hao and S. L. An, *J. Mater. Chem. C*, 2017, 5(15), 3838.

- 9 X. Bai, Z. W. Yang, Y. H. Zhan, Z. Hu, Y. T. Ren, M. J. Li, Z. Xu, A. Ullah, I. Khan, J. B. Qiu, Z. G. Song, B. T. Liu and Y. H. Wang, *ACS Appl. Mater. Interfaces*, 2020, 12(19), 21936.
- 10 J. Q. Bi, T. Wei, L. H. Shen, F. M. Yang, C. Z. Zhao, M. C. Wang, Q. Q. Yang and Y. X. Lin, *J. Am. Ceram. Soc.*, 2021, 104(4), 1785.
- 11 H. Q. Sun, Y. Lv, Y. Zhu, J. F. Lin, X. Wu, Q. W. Zhang and X. H. Hao, *J. Am. Ceram. Soc.*, 2019, 102(11), 6732.
- 12 Z. H. Lu, K. X. Li, J. Wang, L. H. Luo, *Opt. Mater.*, 2021, 111, 110718.
- 13 Q. W. Zhang, H. Q. Sun, H. Li, X. S. Wang, X. H. Hao, J. L. Song, S. L. An, *Chem. Commun.*, 2015, 51, 16316.
- 14 Q. W. Zhang, H. Q. Sun, X. S. Wang, X. H. Hao and S. L. An, *ACS Appl. Mater. Interfaces*, 2015, 7, 25289.
- 15 Q. W. Zhang, Y. Zhang, H. Q. Sun, Q. Sun, X. S. Wang, X. H. Hao and S. L. An, *J. Eur. Ceram. Soc.*, 2017, 37, 955.
